# Supplementary material for: Predicting the Impact of Diffuse Alveolar Damage through Open Lung Biopsy in Acute Respiratory Distress Syndrome—The PREDATOR Study
Source: J Clin Med. 2019 Jun 11;8(6):829. doi: 10.3390/jcm8060829 (PMC6616523; doi:10.3390/jcm8060829)
Supplement: Supplementary file 1 [file jcm-08-00829-s001.zip]

Archive with 6 entries (6 files):
- Article Predator_Figure S1_V7 imputation algorithm.pdf
- Article Predator_Table S1_V7 variables recorded.docx
- Article Predator_Table S2_V7 missing data.docx
- Article Predator_Table S3_V7 trainee validation.xlsx
- Article Predator_Table S4_V7 DAD bivariate.xlsx
- Article Predator_Table S5_V7 mortality bivariate.xlsx
