# Supplementary material for: Predicting the Impact of Diffuse Alveolar Damage through Open Lung Biopsy in Acute Respiratory Distress Syndrome—The PREDATOR Study
Source: J Clin Med. 2019 Jun 11;8(6):829. doi: 10.3390/jcm8060829 (PMC6616523; doi:10.3390/jcm8060829)
Supplement: Supplementary file 1 [file jcm-08-00829-s001.zip › Article Predator_Table S3_V7 trainee validation.xlsx]

## Sheet: 3 8 2018 univariante_trainee_va
	data set 2				data set 3				dataset 4				dataset 5
	All patients (n=258)	Trainne (n=193)	Validation (n=65)	p value	All patients (n=258)	Trainne (n=193)	Validation (n=65)	p value	All patients (n=258)	Trainne (n=193)	Validation (n=65)	p value	All patients (n=258)	Trainne (n=193)	Validation (n=65)	p value
Comorbidities
Active smoking	42(16)	37(19)	5(08)	0.048	42(16)	37(19)	5(08)	0.048	42(16)	37(19)	5(08)	0.048	42(16)	37(19)	5(08)	0.048
Active solid neoplasms	48(19)	37(19)	11(17)	0.827	48(19)	37(19)	11(17)	0.827	48(19)	37(19)	11(17)	0.827	48(19)	37(19)	11(17)	0.827
Active hematooncology neoplasm	39(15)	32(17)	7(11)	0.352	39(15)	32(17)	7(11)	0.352	39(15)	32(17)	7(11)	0.352	39(15)	32(17)	7(11)	0.352
Chemotherapy within the last 3 month	29(11)	22(11)	7(11)	1	29(11)	22(11)	7(11)	1	29(11)	22(11)	7(11)	1	29(11)	22(11)	7(11)	1
Organ transplant	8(3)	7(4)	1(2)	0.684	8(3)	7(4)	1(2)	0.684	8(3)	7(4)	1(2)	0.684	8(3)	7(4)	1(2)	0.684
AIDS/HIV.	10(4)	7(4)	3(5)	0.716	10(4)	7(4)	3(5)	0.716	10(4)	7(4)	3(5)	0.716	10(4)	7(4)	3(5)	0.716
Arterial hypertension	71(28)	55(28)	16(25)	0.656	71(28)	55(28)	16(25)	0.656	71(28)	55(28)	16(25)	0.656	71(28)	55(28)	16(25)	0.656
Coronary ischemic	28(11)	22(11)	6(09)	0.798	28(11)	22(11)	6(09)	0.798	28(11)	22(11)	6(09)	0.798	28(11)	22(11)	6(09)	0.798
Chronic cardiac failure (NYHA III or IV)	29(11)	22(11)	7(11)	1	29(11)	22(11)	7(11)	1	29(11)	22(11)	7(11)	1	29(11)	22(11)	7(11)	1
Chronic kidney injury	13(5)	11(6)	2(3)	0.527	13(5)	11(6)	2(3)	0.527	13(5)	11(6)	2(3)	0.527	13(05)	11(06)	2(03)	0.527
Mellitus diabetes	46(18)	35(18)	11(17)	0.973	46(18)	35(18)	11(17)	0.973	46(18)	35(18)	11(17)	0.973	46(18)	35(18)	11(17)	0.973
Mellitus diabetes insuline requirement	8(3)	8(4)	0(0)	0.208	8(3)	8(4)	0(0)	0.208	8(3)	8(4)	0(0)	0.208	8(3)	8(4)	0(0)	0.208
Domiciliary oxygen therapy	10(4)	8(4)	2(3)	1	10(4)	8(4)	2(3)	1	10(4)	8(4)	2(3)	1	10(4)	8(4)	2(3)	1
Inhaled b2 agonist	6(2)	6(3)	0(0)	0.342	6(2)	6(3)	0(0)	0.342	6(2)	6(3)	0(0)	0.342	6(2)	6(3)	0(0)	0.342
Inhaled steroids	11(4)	11(6)	0(0)	0.071	11(4)	11(6)	0(0)	0.071	11(4)	11(6)	0(0)	0.071	11(4)	11(6)	0(0)	0.071
Systemic steroids	27(1)	26(13)	1(2)	0.013	27(1)	26(13)	1(2)	0.013	27(1)	26(13)	1(2)	0.013	27(1)	26(13)	1(2)	0.013
Chronic obstructive pulmonary disease	48(19)	35(18)	13(2)	0.881	48(19)	35(18)	13(2)	0.881	48(19)	35(18)	13(2)	0.881	48(19)	35(18)	13(2)	0.881
Baseline characteristic
Female	89(34)	66(34)	23(35)	0.981	89(34)	66(34)	23(35)	0.981	89(34)	66(34)	23(35)	0.981	89(34)	66(34)	23(35)	0.981
Age (years old)	61.5(46.25,71)	61(46,70)	64(48,74)	0.372	61.5(46.25,71)	61(46,70)	64(48,74)	0.372	61.5(46.25,71)	61(46,70)	64(48,74)	0.372	61.5(46.25,71)	61(46,70)	64(48,74)	0.372
Weight (Kg)	65(57,75)	65(56.9,75)	66(59,73)	0.818	65(56,75)	64(55,75)	69(60,77)	0.08	65.15(56,76)	65(56,75)	69(60,77)	0.25	65.58(56,75)	65(56,75)	69(60,76)	0.209
Death	158(61)	117(61)	41(63)	0.838	158(61)	117(61)	41(63)	0.838	158(61)	117(61)	41(63)	0.838	158(61)	117(61)	41(63)	0.838
Presence of DAD	143(55)	109(56)	34(52)	0.659	143(55)	109(56)	34(52)	0.659	143(55)	109(56)	34(52)	0.659	143(55)	109(56)	34(52)	0.659
Days from ARDS to OLB	6(2,12)	7(2,12)	6(2,14)	0.769	6(2,12)	7(2,12)	6(2,14)	0.712	6(2,12)	7(2,12)	6(2,14)	0.709	6(2,12)	7(2,12)	6(2,14)	0.782
Days from hospital admission to ARDS	3(0,8)	3(0,8)	4(1,8)	0.668	3(0,8)	3(0,8)	4(1,8)	0.746	3(0.25,9)	3(0,9)	4(1,8)	0.89	3(0,8)	3(0,8)	4(1,8)	0.674
Days of hospital stayed	40(21,63.75)	39(21,61)	42(21,68)	0.64	41.5(22.5,65)	41(24,63)	42(22,68)	0.803	40(22,63)	40(22,62)	42(22,67)	0.93	40(21.25,64)	40(22,64)	40(21,67)	0.931
Days of ICU stayed	29.5(16,47)	29(16,47)	34(17,48)	0.396	29.5(16,47)	29(16,47)	34(17,48)	0.396	29.5(16,47)	29(16,47)	34(17,48)	0.396	29.5(16,47)	29(16,47)	34(17,48)	0.396
Days on mechanical ventilation	19(11,35.75)	19(11,36)	19(12,33)	0.678	18(11,35.75)	18(11,38)	18(12,34)	0.794	18(11,36)	17(11,36)	19(11,36)	0.437	18(11,35.75)	19(11,38)	16(10,32)	0.502
Day of ARDS
Fio2	0.8(0.6,1)	0.8(0.6,1)	0.8(0.6,0.95)	0.515	0.8(0.6,1)	0.8(0.6,1)	0.75(0.6,0.9)	0.459	0.8(0.6,1)	0.8(0.6,1)	0.8(0.6,1)	0.439	0.8(0.6,1)	0.8(0.6,1)	0.8(0.6,0.9)	0.308
Pa02 (mmHg)	79(64.4,105.07)	77(64.3,105.1)	81(64.7,104.7)	0.726	79.1(63.4,105.07)	77(63,105)	83.8(66,106)	0.437	79.4(64.78,108.33)	78(63.4,112.5)	83.2(68,106)	0.54	80.25(64.4,105.07)	78.4(63.4,105.1)	83.2(68,104.7)	0.549
Pa02Fi02 rate	116.15(81.15,161.8)	115.12(78,163.29)	121.25(85,158.33)	0.694	116.83(81.15,164.75)	115.12(78,165)	124(85,160)	0.764	116.83(81.03,164.75)	115.62(78,168)	121.25(85,158.33)	0.814	117.54(81.74,163.82)	115.62(78,165)	125.26(86.3,158.33)	0.658
PaCo2 (mmHg)	41(34.62,50.18)	40.7(35,50.1)	41.3(34,51)	0.713	41.4(34,51)	41.4(34.5,50.1)	41.3(33.4,52)	0.797	41.35(34.62,51)	41(35.5,51)	42(33.5,53)	0.785	42(35.12,51)	41.4(35.5,50.2)	44(33.5,53.5)	0.435
Volume tidal (ml)	402(352,450)	408(360,450)	390(350,456)	0.602	400(350,450.75)	400(350,450)	400(350,452)	0.561	405(350,451.75)	409(350,451)	400(350,452)	0.606	402(350,450.75)	408(350,450)	400(350,452)	0.739
Volumen tidal per kg (ml/kg)	6(4.89,7.4)	6(4.89,7.44)	5.65(4.86,7.09)	0.229	6.21(4.93,7.7)	6.4(5.05,8.15)	5.49(4.72,7.09)	0.008	6.03(4.9,7.6)	6.04(4.98,7.86)	5.65(4.72,7.17)	0.053	6.03(4.89,7.52)	6.04(4.89,7.72)	6.02(4.89,7.23)	0.443
Plateau pressure (mmHg)	24.5(22,28)	24(22,28)	25(22,27.5)	0.731	24(21,27.5)	24(20,28)	24(22,27)	0.362	25(22,28)	24(22,28)	25(22,27.5)	0.383	24(21,28)	23(20,28)	25(22,27.5)	0.044
PEEP (mmHg)	10(8,12)	10(7,12)	10(10,12)	0.059	10(8,12)	10(8,12)	10(10,12)	0.073	10(8,12)	10(7,12)	10(8,12)	0.072	10(8,12)	10(7,12)	10(8,12)	0.076
Driving pressure (mmhg)	17(13,20)	17(12,19)	17(14,20)	0.503	15(12,20)	15(12,20)	15(12,19)	0.952	14(12,19)	14(12,18)	15(13,19)	0.344	15(12,19)	14(12,18)	15(13,22)	0.015
Static compliance (mmhg/ml)	27.86(21.88,34.46)	28.91(21.88,35)	27.86(22.86,30.93)	0.169	29.41(23.08,34.62)	30(23.21,35)	27.86(23,33.33)	0.518	27.25(22.67,33.53)	27.5(21.88,34.46)	26.92(22.86,33.33)	0.767	27(21.88,35)	27.5(21.88,35)	26.92(22.63,30.93)	0.288
Arterial Ph	7.38(7.29,7.43)	7.37(7.29,7.42)	7.39(7.29,7.45)	0.104	7.37(7.29,7.43)	7.35(7.3,7.42)	7.38(7.29,7.44)	0.339	7.37(7.29,7.43)	7.37(7.28,7.43)	7.38(7.29,7.44)	0.53	7.37(7.29,7.43)	7.35(7.29,7.42)	7.38(7.29,7.45)	0.214
Number of affected cuadrant in the chest X ray	4(4,4)	4(4,4)	4(4,4)	0.06	4(4,4)	4(4,4)	4(4,4)	0.107	4(4,4)	4(4,4)	4(4,4)	0.177	4(4,4)	4(4,4)	4(4,4)	0.251
Respiratory rate (rpm)	25(20,31)	25(20,31)	25(20,30)	0.773	25(20,31)	25(20,31)	25(20,30)	0.742	25(20,30)	25(20,31)	25(20,30)	0.951	25(20,31)	25(20,31)	25(20,30)	0.841
Heart rate (bpm)	102(90,119)	100(90,119)	110(90,120)	0.371	105±21.51	104.11±21.88	107.65±20.29	0.236	102(90,119)	100(90,119)	110(90,118)	0.432	102.5(91,119)	101(91,119)	109(91,120)	0.394
Systolic arterial pressure (mmHg)	112(98,130)	114(98,130)	107(98,128)	0.538	112(99,130)	114(99,130)	107(99,124)	0.349	114(100,130)	116(100,130)	107(99,129)	0.401	112(100,130)	114(100,130)	107(99,127)	0.484
Temperature (Cº)	37.2(36.52,38)	37.2(36.5,38)	37.5(36.8,38.1)	0.492	37.2(36.6,38)	37.2(36.6,38)	37.5(36.8,38.2)	0.253	37.2(36.6,38)	37.2(36.5,38)	37.3(36.8,38.1)	0.603	37.2(36.6,37.9)	37.2(36.5,37.8)	37.5(36.8,38.1)	0.107
Prone possition	2(1)	2(1)	0(0)	1	2(1)	2(1)	0(0)	1	2(1)	2(1)	0(0)	1	2(1)	2(1)	0(0)	1
Haemoglobin (gr/dl)	10.55(8.8,11.97)	10.4(8.6,11.7)	10.7(9.5,12.2)	0.081	10.6(8.83,12.17)	10.6(8.7,12.3)	10.5(9.2,11.9)	0.914	10.6(8.9,12.28)	10.4(8.7,12.3)	11(9.8,12.2)	0.08	10.5(8.72,11.8)	10.1(8.6,11.7)	10.7(9.3,12.1)	0.153
Leukocytes (cells/ul)	11400(9100,15747.5)	11310(8900,15300)	11700(9300,17300)	0.49	11600(8900,16400)	11400(8500,15400)	13200(9300,17600)	0.31	11400(8500,15935)	11400(8500,15400)	11270(9300,17300)	0.513	11355(8500,15747.5)	11200(8100,15300)	13200(9500,17300)	0.134
Platelets (cells/ul)	185500(115250,269750)	176000(109000,281000)	201000(150000,265000)	0.08	182000(118000,267750)	168000(111000,269000)	206000(150000,265000)	0.048	185500(118250,281750)	177000(115000,282000)	206000(150000,267000)	0.11	185500(123500,281750)	178000(116000,282000)	206000(155000,265000)	0.161
Creatinine (mg/dl)	0.88(0.67,1.3)	0.9(0.72,1.31)	0.74(0.6,1)	0.014	0.9(0.67,1.31)	0.98(0.72,1.35)	0.74(0.6,1.2)	0.016	0.9(0.67,1.39)	0.95(0.72,1.4)	0.74(0.6,1.2)	0.02	0.88(0.66,1.3)	0.9(0.72,1.3)	0.74(0.6,1.2)	0.014
INR	1.2(1,1.4)	1.2(1,1.4)	1.2(0.9,1.3)	0.86	1.2(1,1.4)	1.2(1,1.4)	1.2(1.1,1.4)	0.525	1.2(0.92,1.4)	1.2(1,1.4)	1.2(0,1.3)	0.549	1.2(0.8,1.4)	1.2(0.8,1.4)	1.2(0,1.3)	0.743
Total bilirrubin (mg/dl)	0.53(0.3,1.06)	0.53(0.3,1.06)	0.5(0.3,1.06)	0.865	0.5(0.3,1.04)	0.53(0.3,1)	0.5(0.4,1.06)	0.578	0.53(0.3,1.06)	0.6(0.3,1.18)	0.5(0.1,0.8)	0.094	0.52(0.29,1)	0.53(0.24,1.06)	0.5(0.35,0.9)	0.846
Dose of norepinephrine (mcg/kg/min)	0(0,0.1)	0(0,0.09)	0(0,0.2)	0.499	0(0,0.1)	0(0,0.12)	0(0,0.1)	0.507	0(0,0.09)	0(0,0.09)	0(0,0.1)	0.809	0(0,0.1)	0(0,0.09)	0(0,0.15)	0.706
Antibiotics	180(7)	132(68)	48(74)	0.502	180(7)	132(68)	48(74)	0.502	180(7)	132(68)	48(74)	0.502	180(7)	132(68)	48(74)	0.502
Antifungal	30(12)	24(12)	6(09)	0.636	30(12)	24(12)	6(09)	0.636	30(12)	24(12)	6(09)	0.636	30(12)	24(12)	6(09)	0.636
Antiviral	29(11)	23(12)	6(09)	0.714	29(11)	23(12)	6(09)	0.714	29(11)	23(12)	6(09)	0.714	29(11)	23(12)	6(09)	0.714
Inhaled steroids	11(4)	11(6)	0(0)	0.071	11(4)	11(6)	0(0)	0.071	11(4)	11(6)	0(0)	0.071	11(4)	11(6)	0(0)	0.071
Endovenous steroids	31(12)	23(12)	8(12)	1	31(12)	23(12)	8(12)	1	31(12)	23(12)	8(12)	1	31(12)	23(12)	8(12)	1
Day of OLB
Fio2	0.6(0.45,0.75)	0.6(0.5,0.8)	0.5(0.45,0.7)	0.016	0.6(0.5,0.75)	0.6(0.5,0.8)	0.55(0.45,0.7)	0.031	0.6(0.5,0.8)	0.6(0.5,0.8)	0.55(0.5,0.7)	0.03	0.6(0.5,0.75)	0.6(0.5,0.8)	0.55(0.45,0.7)	0.05
Pa02 (mmHg)	76(64,90.45)	76(64.7,91.5)	75(63.3,88)	0.318	75(63.45,88.97)	76(64,89.8)	73(63,86)	0.192	76(63.6,88.8)	76(64,89.1)	75(63,86)	0.299	75.5(64,88.38)	75(64,88.9)	76(63,88)	0.464
Pa02Fi02 rate	136.98(94.56,176.44)	140(93.71,178)	129(100,172)	0.984	135.25(92.8,176.44)	137.29(90.5,178)	126.67(97.83,172)	0.888	138.69(94,179.22)	140(93.71,178.5)	129(100,179.45)	0.942	135(91.05,177.73)	135.5(87.9,178)	135(100,173.14)	0.749
PaCo2 (mmHg)	46.55(39.28,57.08)	48(39.1,57)	46(40,57.1)	0.872	46.1(39,57)	47(39,57)	46(39.2,57)	0.844	46.95(39.02,57.3)	47(39,57.3)	46(39.5,57.1)	0.917	46(39.1,57)	46.2(39,57)	46(39.5,57.1)	0.984
Volume tidal (ml)	420(360,500)	430(370,500)	400(350,464)	0.052	430(360,500)	440(360,500)	393(359,500)	0.148	420(360,500)	430(360,500)	400(380,494)	0.261	420(355,480)	420(355,476)	400(359,500)	0.968
Volumen tidal per kg (ml/kg)	6.36(5.06,7.93)	6.38(4.95,7.75)	6.35(5.18,8.06)	0.812	6.23(5.06,7.72)	6.45(5.17,7.81)	5.97(5,7.24)	0.107	6.36(5.09,7.6)	6.45(5.32,7.63)	6.03(4.85,7.24)	0.073	6.17(5.15,7.4)	6.36(5.15,7.35)	6.11(5.18,7.65)	0.547
Plateau pressure (mmHg)	29(26,34)	28(25,33)	32(27,36)	0.019	30(26,35)	29(25,34)	31(27,36)	0.056	30(25,34.75)	29(25,33)	31(26,35)	0.219	30(26,35)	29(25,34)	31(26,36)	0.159
PEEP (mmHg)	10(6,12)	10(5,13)	10(8,12)	0.651	10(6,12)	10(5,13)	10(8,12)	0.651	10(6,12)	10(5,13)	10(8,12)	0.696	10(6,12)	10(5,13)	10(8,12)	0.83
Driving pressure (mmhg)	19(15,23)	19(15,22)	19(15,25)	0.369	19(15,24)	19(15,23)	22(15,26)	0.02	19(15,25)	19(16,24)	22(15,26)	0.188	19(15,23.75)	19(15,23)	22(15,25)	0.179
Static compliance (mmhg/ml)	22.31(16.11,29.69)	22.76(16.67,31.93)	18.64(14.58,27.33)	0.275	21.88(14.66,28.35)	22.76(15.29,28.75)	17.54(13.36,27.06)	0.123	21.65(14.9,27.65)	21.88(15,27.75)	18.64(14.58,27.06)	0.329	22.53(14.9,28.67)	21.88(15.04,30)	24.71(13.36,27.33)	0.444
Arterial Ph	7.38(7.32,7.44)	7.38(7.32,7.43)	7.4(7.35,7.46)	0.031	7.38(7.33,7.45)	7.38(7.32,7.43)	7.4(7.35,7.45)	0.081	7.38(7.33,7.44)	7.38(7.32,7.43)	7.4(7.35,7.46)	0.107	7.39(7.33,7.44)	7.38(7.32,7.43)	7.4(7.35,7.46)	0.056
Number of affected cuadrant in the chest X ray	4(4,4)	4(4,4)	4(4,4)	0.256	4(4,4)	4(4,4)	4(4,4)	0.255	4(4,4)	4(4,4)	4(4,4)	0.267	4(4,4)	4(4,4)	4(4,4)	0.207
Respiratory rate (rpm)	25(20,30)	25(20,30)	25(21,30)	0.968	25(20,30)	25(20,30)	25(21,30)	0.884	25(20,30)	25(20,30)	25(21,30)	0.547	25(20,30)	25(20,30)	25(21,30)	0.286
Heart rate (bpm)	99.03±20.5	99.04±20.69	99±20.06	0.99	98.43±19.91	97.04±19.74	102.55±19.97	0.056	97.98±19.88	97.39±19.77	99.72±20.29	0.421	98.2±20.38	97.34±20.25	100.75±20.72	0.25
Systolic arterial pressure (mmHg)	119(108,135)	115(106,133)	126(111,148)	0.006	118(106,136)	115(105,135)	121(109,143)	0.123	119(106,138)	115(106,136)	126(111,148)	0.07	120(106.5,135)	118(106,135)	121(109,140)	0.252
Temperature (Cº)	37.1(36.5,37.8)	37.1(36.5,37.9)	37(36.8,37.6)	0.537	37.2±1	37.22±1.05	37.13±0.84	0.444	37.16±0.98	37.19±1.02	37.08±0.84	0.412	37.13±1.04	37.13±1.06	37.12±0.99	0.939
Prone possition	13(0.05)	9(0.05)	4(0.06)	0.743	13(0.05)	9(0.05)	4(0.06)	0.743	13(0.05)	9(0.05)	4(0.06)	0.743	13(0.05)	9(0.05)	4(0.06)	0.743
Haemoglobin (gr/dl)	9.5(8.5,10.5)	9.2(8.3,10.3)	10.1(9.2,10.9)	0.001	9.4(8.5,10.5)	9.2(8.3,10.4)	9.9(9.2,10.7)	0.003	9.5(8.6,10.5)	9.4(8.3,10.3)	10.1(8.9,10.9)	0.002	9.5(8.5,10.5)	9.3(8.3,10.3)	10.1(9.2,10.9)	0.001
Leukocytes (cell/ul)	12215(8600,17900)	12000(8900,17500)	12500(8100,18200)	0.939	12350(8500,17225)	12400(8600,15800)	11200(8100,19700)	0.965	11805(8600,17500)	12300(8900,17000)	10500(7500,18200)	0.338	11805(8600,17000)	12300(9000,16000)	11100(7300,17300)	0.289
Platelets (cells/ul)	169000(106250,260500)	170000(102000,263000)	169000(120000,239000)	0.768	170500(110250,259000)	172000(102000,264000)	160000(121000,239000)	0.827	171500(109250,263750)	172000(102000,271000)	160000(119000,239000)	0.946	172000(109250,260500)	172000(102000,263000)	169000(121000,250000)	0.699
Creatinine (mg/dl)	0.86(0.57,1.31)	0.9(0.61,1.31)	0.8(0.5,1.31)	0.161	0.84(0.57,1.3)	0.85(0.59,1.3)	0.8(0.5,1.3)	0.32	0.86(0.6,1.31)	0.9(0.64,1.3)	0.8(0.5,1.31)	0.168	0.84(0.6,1.3)	0.89(0.65,1.3)	0.8(0.5,1.35)	0.311
INR	1.2(1.1,1.4)	1.2(1.1,1.4)	1.2(1.1,1.3)	0.63	1.2(1.1,1.4)	1.2(1.1,1.4)	1.2(1.1,1.3)	0.55	1.2(1.1,1.37)	1.2(1.1,1.4)	1.2(1.1,1.3)	0.715	1.2(1.1,1.37)	1.2(1.1,1.4)	1.2(1.1,1.3)	0.966
Total bilirrubin (mg/dl)	0.5(0.2,0.93)	0.5(0.2,0.9)	0.5(0.29,1.2)	0.738	0.47(0.2,0.9)	0.47(0.2,0.88)	0.4(0.2,1.2)	0.934	0.5(0.24,1)	0.5(0.24,1)	0.35(0.2,0.77)	0.104	0.47(0.21,0.9)	0.47(0.24,0.88)	0.4(0.2,1.29)	0.824
Dose of norepinephrine (mcg/kg/min)	0(0,0.04)	0(0,0)	0(0,0.07)	0.47	0(0,0.07)	0(0,0.07)	0(0,0.07)	0.785	0(0,0.07)	0(0,0.06)	0(0,0.07)	0.843	0(0,0.05)	0(0,0.06)	0(0,0)	0.464
Antibiotics	89(34)	71(37)	18(28)	0.237	89(34)	71(37)	18(28)	0.237	89(34)	71(37)	18(28)	0.237	89(34)	71(37)	18(28)	0.237
Antifungal	21(8)	16(8)	5(8)	1	21(8)	16(8)	5(8)	1	21(8)	16(8)	5(8)	1	21(8)	16(8)	5(8)	1
Antiviral	14(5)	10(5)	4(6)	0.756	14(5)	10(5)	4(6)	0.756	14(5)	10(5)	4(6)	0.756	14(5)	10(5)	4(6)	0.756
Inhaled steroids	5(2)	5(3)	0(0)	0.335	5(2)	5(3)	0(0)	0.335	5(2)	5(3)	0(0)	0.335	5(2)	5(3)	0(0)	0.335
Endovenous steroids	116(45)	82(42)	34(52)	0.061	116(45)	82(42)	34(52)	0.218	116(45)	82(42)	34(52)	0.171	116(45)	82(42)	34(52)	0.218
