# Supplementary material for: Predicting the Impact of Diffuse Alveolar Damage through Open Lung Biopsy in Acute Respiratory Distress Syndrome—The PREDATOR Study
Source: J Clin Med. 2019 Jun 11;8(6):829. doi: 10.3390/jcm8060829 (PMC6616523; doi:10.3390/jcm8060829)
Supplement: Supplementary file 1 [file jcm-08-00829-s001.zip › Article Predator_Table S4_V7 DAD bivariate.xlsx]

## Sheet: Hoja1
	data set 2				data set 3				dataset 4				dataset 5
Comorbidities	All patients - trainee cohort - (n=193)	Non DAD (n= 84)	DAD (n= 109)	p value	All patients - trainee cohort - (n=193)	Non DAD (n= 84)	DAD (n= 109)	p value	All patients - trainee cohort - (n=193)	Non DAD (n= 84)	DAD (n= 109)	p value	All patients - trainee cohort - (n=193)	Non DAD (n= 84)	DAD (n= 109)	p value
Active smoking	37(19)	17(2)	20(18)	0.884	37(19)	17(2)	20(18)	0.884	37(19)	17(2)	20(18)	0.884	37(19)	17(2)	20(18)	0.884
Active solid neoplasms	37(19)	12(14)	25(23)	0.184	37(19)	12(14)	25(23)	0.184	37(19)	12(14)	25(23)	0.184	37(19)	12(14)	25(23)	0.184
Active hematooncology neoplasm	32(17)	15(18)	17(16)	0.823	32(17)	15(18)	17(16)	0.823	32(17)	15(18)	17(16)	0.823	32(17)	15(18)	17(16)	0.823
Chemotherapy within the last 3 month	22(11)	9(11)	13(12)	0.973	22(11)	9(11)	13(12)	0.973	22(11)	9(11)	13(12)	0.973	22(11)	9(11)	13(12)	0.973
Organ transplant	7(4)	3(4)	4(4)	1	7(4)	3(4)	4(4)	1	7(4)	3(4)	4(4)	1	7(4)	3(4)	4(4)	1
AIDS/HIV.	7(4)	3(4)	4(4)	1	7(4)	3(4)	4(4)	1	7(4)	3(4)	4(4)	1	7(4)	3(4)	4(4)	1
Arterial hypertension	55(28)	25(3)	30(28)	0.857	55(28)	25(3)	30(28)	0.857	55(28)	25(3)	30(28)	0.857	55(28)	25(3)	30(28)	0.857
Coronary ischemic	22(11)	3(04)	19(17)	0.006	22(11)	3(04)	19(17)	0.006	22(11)	3(04)	19(17)	0.006	22(11)	3(04)	19(17)	0.006
Chronic cardiac failure (NYHA III or IV)	22(11)	8(1)	14(13)	0.623	22(11)	8(1)	14(13)	0.623	22(11)	8(1)	14(13)	0.623	22(11)	8(1)	14(13)	0.623
Chronic kidney injury	11(6)	5(6)	6(6)	1	11(6)	5(6)	6(6)	1	11(6)	5(6)	6(6)	1	11(6)	5(6)	6(6)	1
Mellitus diabetes	35(18)	17(2)	18(17)	0.633	35(18)	17(2)	18(17)	0.633	35(18)	17(2)	18(17)	0.633	35(18)	17(2)	18(17)	0.633
Mellitus diabetes insuline requirement	8(4)	4(5)	4(4)	0.73	8(4)	4(5)	4(4)	0.73	8(4)	4(5)	4(4)	0.73	8(4)	4(5)	4(4)	0.73
Domiciliary oxygen therapy	8(4)	6(7)	2(2)	0.08	8(4)	6(7)	2(2)	0.08	8(4)	6(7)	2(2)	0.08	8(4)	6(7)	2(2)	0.08
Inhaled b2 agonist	6(3)	2(2)	4(4)	0.699	6(3)	2(2)	4(4)	0.699	6(3)	2(2)	4(4)	0.699	6(3)	2(2)	4(4)	0.699
Inhaled steroids	11(6)	6(7)	5(5)	0.537	11(6)	6(7)	5(5)	0.537	11(6)	6(7)	5(5)	0.537	11(6)	6(7)	5(5)	0.537
Systemic steroids	26(13)	13(15)	13(12)	0.615	26(13)	13(15)	13(12)	0.615	26(13)	13(15)	13(12)	0.615	26(13)	13(15)	13(12)	0.615
Chronic obstructive pulmonary disease	35(18)	12(14)	23(21)	0.303	35(18)	12(14)	23(21)	0.303	35(18)	12(14)	23(21)	0.303	35(18)	12(14)	23(21)	0.303
Baseline characteristic
Female	66(34)	30(36)	36(33)	0.813	66(34)	30(36)	36(33)	0.813	66(34)	30(36)	36(33)	0.813	66(34)	30(36)	36(33)	0.813
Age (years old)	61(46,70)	60.5(45.75,69.25)	62(46,70)	0.59	61(46,70)	60.5(45.75,69.25)	62(46,70)	0.59	61(46,70)	60.5(45.75,69.25)	62(46,70)	0.59	61(46,70)	60.5(45.75,69.25)	62(46,70)	0.59
Weight (Kg)	65(56.9,75)	62.35(54,74.25)	65(58,75)	0.254	64(55,75)	62(54,72.38)	65(57,75)	0.123	65(56,75)	63.5(53.5,74.25)	65(58,76)	0.193	65(56,75)	64.5(55,74.25)	65(56,75)	0.683
Death	117(61)	43(51)	74(68)	0.027	117(61)	43(51)	74(68)	0.027	117(61)	43(51)	74(68)	0.027	117(61)	43(51)	74(68)	0.027
Days from ARDS to OLB	7(2,12)	7(2,13)	6(3,11)	0.374	7(2,12)	7(2,13)	6(3,11)	0.46	7(2,12)	7(2,13)	6(3,11)	0.444	7(2,12)	7(2,13)	6(3,11)	0.363
Days from hospital admission to ARDS	3(0,8)	3(0,8.25)	3(0,8)	0.821	3(0,8)	3(1,8.25)	3(0,8)	0.569	3(0,8)	3(1,8.25)	3(0,8)	0.591	3(0,8)	3(0,8.25)	3(0,8)	0.85
Days of hospital stayed	39(21,61)	38.5(22,59)	40(21,62)	0.706	41(24,63)	39.5(24.75,62)	43(22,64)	0.681	40(22,62)	38.5(21.5,59)	41(22,63)	0.436	40(22,64)	40(24,64.75)	42(20,63)	0.97
Days of ICU stay	29(16,47)	28.5(15.75,43.5)	29(16,47)	0.751	29(16,47)	28.5(15.75,43.5)	29(16,47)	0.751	29(16,47)	28.5(15.75,43.5)	29(16,47)	0.751	29(16,47)	28.5(15.75,43.5)	29(16,47)	0.751
Days on mechanical ventilation	19(11,36)	15(11,30.25)	21(10,42)	0.327	18(11,38)	15(11,31)	21(10,42)	0.541	18(11,38)	15(11,30.25)	23(11,42)	0.222	19(11,38)	15(11,30.25)	23(11,43)	0.197
Day of ARDS
Fio2	0.8(0.6,1)	0.8(0.6,1)	0.8(0.6,1)	0.479	0.8(0.6,1)	0.8(0.6,1)	0.8(0.6,1)	0.648	0.8(0.6,1)	0.8(0.6,1)	0.8(0.6,1)	0.984	0.8(0.6,1)	0.8(0.6,1)	0.8(0.6,1)	0.689
Pa02 (mmHg)	77(64.3,105.1)	75.1(62.75,92.1)	84(65,113)	0.101	77(63,105)	75.2(61.08,99.55)	80.9(65,113)	0.21	79.6(65,106.3)	76(62.75,92)	84(65.5,118)	0.062	78.4(63.4,105.1)	76(61.77,92.92)	84(65,116.8)	0.085
Pa02Fi02 rate	115.12(78,163.29)	113.39(77.6,155.98)	117.87(81.25,178.29)	0.41	115.12(78,165)	114.37(82.08,159.19)	115.62(74,175)	0.854	115.12(76.4,168)	107.46(75,151.89)	123.33(85.56,182.18)	0.091	115.62(78,165)	112.5(77.6,151.89)	122(81.25,179.4)	0.284
PaCo2 (mmHg)	40.7(35,50.1)	41.7(34.38,49.85)	40(35,51)	0.762	41.4(34.5,50.1)	42.4(34.5,49.2)	41(35,51)	0.965	42(35.5,51)	43.65(36.53,51.25)	40(34,51)	0.312	41.4(35.5,50.2)	43(35.88,49.85)	40(35.5,51)	0.639
Tidal volume (ml)	430(370,500)	420(360,500)	440(380,500)	0.584	440(360,500)	430(353.75,500)	443(390,500)	0.346	440(360,500)	430(353.75,500)	450(390,504)	0.125	420(355,476)	420(350,465)	420(355,476)	0.537
Tidal volume (ml/kg)	6.38(4.95,7.75)	6.39(5.38,7.77)	6.36(4.93,7.75)	0.56	6.45(5.17,7.81)	6.37(5.1,7.67)	6.54(5.19,7.81)	0.552	6.13(4.93,7.63)	6.28(4.94,7.97)	5.93(4.93,7.53)	0.587	6.36(5.15,7.35)	6.43(5.15,7.46)	6.13(5.17,7.32)	0.677
Plateau pressure (cmH2O)	24(22,28)	24(22,28.25)	25(22,28)	0.874	24(20,28)	23(20,28)	24(22,28)	0.178	24(21,28)	24(20.75,28)	25(21,28)	0.618	23(20,28)	23(20,28)	23(20,28)	0.949
PEEP (cmH2O)	10(7,12)	10(7,12)	10(8,12)	0.188	10(8,12)	10(6,10)	10(8,12)	0.032	10(7,12)	10(6,10)	10(7,12)	0.079	10(7,12)	10(6,12)	10(8,12)	0.088
Driving pressure (cmH2O)	17(12,19)	15.5(12,22)	17(12,19)	0.773	15(12,20)	14(12,20.5)	16(12,20)	0.315	14(12,17)	13(12,17)	15(12,17)	0.464	14(12,18)	14(12,19)	14(12,18)	0.568
Static compliance (ml/cmH2O)	28.91(21.88,35)	27.92(23,34.83)	28.91(20,35)	0.817	30(23.21,35)	28.91(23.08,35.11)	30(23.21,35)	0.595	28.91(23.08,35.45)	29.45(23,34.46)	28.33(23.08,35.45)	0.53	27.5(21.88,35)	27.92(20.88,34.5)	27.5(21.88,35.71)	0.326
Arterial pH	7.37(7.29,7.42)	7.35(7.3,7.42)	7.37(7.28,7.43)	0.729	7.35(7.3,7.42)	7.34(7.29,7.42)	7.37(7.3,7.42)	0.481	7.35(7.29,7.43)	7.34(7.29,7.42)	7.37(7.29,7.44)	0.589	7.35(7.29,7.42)	7.34(7.3,7.42)	7.35(7.29,7.42)	0.871
Respiratory rate (breaths per minute)	25(20,31)	26(21,34.25)	24(19,30)	0.018	25(20,31)	26(20.75,33.25)	25(19,30)	0.028	25(20,30)	26(21,33)	24(19,29)	0.014	25(20,31)	26(21,33.25)	25(19,30)	0.04
Heart rate (beats per minute)	100(90,119)	100(86.75,116.25)	101(92,119)	0.669	102(90,119)	102(89,119)	101(92,119)	0.944	105(92,122)	103.5(89.75,123)	105(92,120)	0.998	101(91,119)	102(89.75,119)	101(92,119)	0.828
Systolic arterial pressure (mmHg)	114(98,130)	111(95.75,130)	115(100,130)	0.808	114(99,130)	112(96.75,130.25)	115(100,129)	0.862	116(101,130)	117(102,132.5)	115(100,127)	0.543	114(100,130)	112(99.5,130)	115(100,130)	0.855
Temperature (Cº)	37.2(36.5,38)	37.6(36.68,38.05)	37(36.5,37.7)	0.032	37.2(36.6,38)	37.5(36.6,38)	37.1(36.5,37.7)	0.256	37.2(36.6,37.9)	37.6(36.9,38)	37(36.5,37.6)	0.01	37.2(36.5,37.8)	37.55(36.88,38)	37(36.5,37.6)	0.017
Prone possition	2(1)	0(0)	2(2)	0.506	2(1)	0(0)	2(2)	0.506	2(1)	0(0)	2(2)	0.506	2(1)	0(0)	2(2)	0.506
Haemoglobin (gr/dl)	10.4(8.6,11.7)	10.1(8.5,11.7)	10.6(8.8,11.7)	0.641	10.6(8.7,12.3)	10.5(8.59,12.33)	10.7(8.8,11.7)	0.906	10.1(8.6,11.7)	10(8.5,12.3)	10.2(8.8,11.6)	0.713	10.1(8.6,11.7)	10.1(8.5,12.05)	10.2(8.6,11.6)	0.793
Leukocytes (cells/ul)	11310(8900,15300)	12000(9100,15325)	11150(8500,15210)	0.493	11400(8500,15400)	12000(8400,15325)	11200(8900,15400)	0.916	11400(8500,15400)	11700(8800,15325)	11400(8500,15400)	0.899	11200(8100,15300)	11005(8100,15300)	11200(8100,15210)	0.995
Platelets (cells/ul)	176000(109000,281000)	177500(83000,272750)	173000(111000,282000)	0.964	168000(111000,269000)	177500(89250,268500)	164000(116000,269000)	0.54	173000(111000,269000)	173500(83000,261250)	173000(116000,281000)	0.877	178000(116000,282000)	176000(89750,257500)	187000(121000,294000)	0.463
Creatinine (mg/dl)	0.9(0.72,1.31)	0.9(0.7,1.3)	0.91(0.73,1.38)	0.462	0.98(0.72,1.35)	1(0.7,1.36)	0.91(0.76,1.31)	0.933	0.98(0.72,1.4)	1(0.66,1.6)	0.93(0.76,1.38)	0.893	0.9(0.72,1.3)	0.99(0.74,1.35)	0.9(0.72,1.28)	0.579
INR	1.2(1,1.4)	1.2(1,1.5)	1.1(0.9,1.3)	0.054	1.2(1,1.4)	1.2(1,1.5)	1.1(1,1.3)	0.024	1.2(0.8,1.4)	1.2(0.98,1.42)	1.1(0.8,1.3)	0.1	1.2(0.8,1.4)	1.2(1,1.4)	1.1(0.7,1.3)	0.106
Total bilirrubin (mg/dl)	0.53(0.3,1.06)	0.6(0.3,1.25)	0.5(0.3,1)	0.337	0.53(0.3,1)	0.6(0.3,1.23)	0.41(0.3,0.88)	0.139	0.53(0.29,0.9)	0.53(0.24,0.88)	0.53(0.3,1)	0.626	0.53(0.24,1.06)	0.6(0.29,1.19)	0.47(0.2,0.99)	0.192
Dose of norepinephrine (mcg/kg/min)	0(0,0.09)	0(0,0.09)	0(0,0.09)	0.844	0(0,0.12)	0(0,0.12)	0(0,0.1)	0.917	0(0,0.09)	0(0,0.08)	0(0,0.1)	0.485	0(0,0.09)	0(0,0.08)	0(0,0.1)	0.358
Antibiotics	132(68)	55(65)	77(71)	0.542	132(68)	55(65)	77(71)	0.542	132(68)	55(65)	77(71)	0.542	132(68)	55(65)	77(71)	0.542
Antifungal	24(12)	8(1)	16(15)	0.392	24(12)	8(1)	16(15)	0.392	24(12)	8(1)	16(15)	0.392	24(12)	8(1)	16(15)	0.392
Antiviral	23(12)	8(1)	15(14)	0.499	23(12)	8(1)	15(14)	0.499	23(12)	8(1)	15(14)	0.499	23(12)	8(1)	15(14)	0.499
Inhaled steroids	0(0)	0(0)	0(0)	.-	0(0)	0(0)	0(0)	.-	0(0)	0(0)	0(0)	.-	0(0)	0(0)	0(0)	.-
Endovenous steroids	23(12)	9(11)	14(13)	0.819	23(12)	9(11)	14(13)	0.819	23(12)	9(11)	14(13)	0.819	23(12)	9(11)	14(13)	0.819
Day of OLB
Fio2	0.6(0.5,0.8)	0.55(0.4,0.8)	0.6(0.5,0.8)	0.105	0.6(0.5,0.8)	0.55(0.4,0.8)	0.6(0.5,0.8)	0.059	0.6(0.5,0.8)	0.55(0.4,0.8)	0.6(0.5,0.8)	0.133	0.6(0.5,0.8)	0.57(0.4,0.8)	0.6(0.5,0.8)	0.164
Pa02 (mmHg)	76(64.7,91.5)	76.95(65.52,88)	75(64,99.3)	0.841	76(64,89.8)	76.9(65.22,86.25)	75(64,98.7)	0.888	76(64.4,89.8)	78.05(66.35,87.93)	72.5(64,94)	0.587	75(64,88.9)	76.95(65.22,86)	72.5(64,92.3)	0.768
Pa02Fi02 rate	140(93.71,178)	142.47(96.58,178.88)	134.67(92.5,170)	0.341	137.29(90.5,178)	143.83(95.78,178.88)	132(89.04,175)	0.308	135(89.04,176.92)	140.64(94.16,181.5)	130(87.9,170)	0.309	135.5(87.9,178)	142.47(87.08,186.96)	131.82(89.04,170)	0.34
PaCo2 (mmHg)	48(39.1,57)	46(38.15,56.25)	49(39.6,57.3)	0.611	47(39,57)	45.4(38,54.73)	49.3(39.1,58.4)	0.221	46(38.2,57)	45.4(37.95,54.17)	49(39.1,58)	0.249	46.2(39,57)	45.9(38.15,54.73)	48.9(39.1,57.3)	0.508
Volume tidal (ml)	408(360,450)	420(357.5,453.25)	400(360,448)	0.724	400(350,450)	420(349.5,460)	400(358,450)	0.667	408(360,460)	420(357.5,460)	400(360,450)	0.475	408(350,450)	420(349.5,460)	400(350,450)	0.598
Volumen tidal per kg (ml/kg)	6(4.89,7.44)	6.22(4.88,7.87)	6(4.9,7.42)	0.401	6.4(5.05,8.15)	6.75(5.14,8.31)	6.28(5.05,7.72)	0.31	6.34(4.93,7.72)	6.69(5.31,8.17)	6.2(4.89,7.44)	0.163	6.04(4.89,7.72)	6.22(4.87,7.87)	6.03(4.93,7.52)	0.672
Plateau pressure (mmHg)	28(25,33)	27.5(23,32.25)	29(25,34)	0.057	29(25,34)	28(22.75,33)	30(27,35)	0.006	30(25,34)	27(22.75,31)	31(27,35)	0	29(25,34)	28(22,33)	30(27,35)	0.037
PEEP (cmH2O)	10(5,13)	8(5,10)	10(6,14)	0.002	10(5,13)	8(5,10)	10(6,14)	0.001	10(5,14)	8(5,12)	10(8,14)	0.001	10(5,13)	8(5,10)	10(7,14)	0.001
Driving pressure (cmH2O)	19(15,22)	18(15,21)	19(16,23)	0.574	19(15,23)	18.5(16,23)	19(14,23)	0.633	20(16,25)	19(16.75,23)	20(16,25)	0.243	19(15,23)	19(15,23)	19(16,23)	0.537
Static compliance (ml/cmH2O)	22.76(16.67,31.93)	22.84(15.9,33.46)	22.31(16.87,27.65)	0.763	22.76(15.29,28.75)	22.32(14.97,33.38)	22.92(16.84,28.35)	0.708	22.31(14.36,28.75)	22.53(14.35,31.93)	21.88(15.04,27.65)	0.959	21.88(15.04,30)	21.88(14.36,34.13)	22.31(16.87,27.65)	0.913
Arterial pH	7.38(7.32,7.43)	7.38(7.34,7.45)	7.38(7.3,7.42)	0.15	7.38(7.32,7.43)	7.38(7.34,7.45)	7.38(7.3,7.43)	0.168	7.39(7.32,7.43)	7.39(7.34,7.45)	7.38(7.31,7.43)	0.284	7.38(7.32,7.43)	7.38(7.34,7.45)	7.38(7.31,7.43)	0.317
Respiratory rate (breaths per minute)	25(20,30)	25(20,30)	25(20,30)	0.66	25(20,30)	25(20,30.25)	25(20,30)	0.699	25(20,30)	25(20,30)	24(19,30)	0.357	25(20,30)	25(20,30)	25(19,30)	0.374
Heart rate (beats per minute)	99.04±20.69	99.4±20.59	98.75±20.86	0.828	96(83,110)	96(83,110.5)	95(84,108)	0.624	96(83,112)	98(83,117)	94(83,109)	0.321	97.34±20.25	98.58±20.42	96.38±20.17	0.455
Systolic arterial pressure (mmHg)	115(106,133)	114.5(106,132.25)	118(106,133)	0.85	115(105,135)	114.5(105.75,136)	116(104,133)	0.865	118(109,134)	114(106,135)	122(110,133)	0.417	118(106,135)	119.5(107.5,137.25)	116(106,132)	0.416
Temperature (Cº)	37.18±1.02	37.16±0.94	37.19±1.08	0.809	37.22±1.05	37.26±0.97	37.2±1.11	0.713	37.22±1.05	37.26±0.99	37.2±1.1	0.676	37.13±1.06	37.23±1.03	37.05±1.07	0.237
Prone possition	9(5)	4(5)	5(5)	1	9(5)	4(5)	5(5)	1	9(5)	4(5)	5(5)	1	9(5)	4(5)	5(5)	1
Haemoglobin (gr/dl)	9.2(8.3,10.3)	9.2(8.1,10.1)	9.4(8.4,10.5)	0.271	9.2(8.3,10.4)	9.2(8.1,10.1)	9(8.4,10.5)	0.512	9.2(8.3,10.3)	9.2(8,10.1)	9.4(8.5,10.3)	0.279	9.3(8.3,10.3)	9.2(8.1,10.03)	9.42(8.3,10.3)	0.243
Leukocytes (cells/ul)	12000(8900,17500)	12650(8900,19200)	11600(8600,17000)	0.285	12400(8600,15800)	13120(8800,15850)	12300(8600,15500)	0.443	12000(8900,17500)	12350(8375,17750)	11610(8900,17000)	0.892	12300(9000,16000)	12650(10002.5,15800)	11610(8900,17000)	0.519
Platelets. (cells/ul)	170000(102000,263000)	171500(96000,272500)	160000(102000,255000)	0.54	172000(102000,264000)	172000(106250,274750)	160000(102000,255000)	0.408	171000(97000,265000)	171500(102000,282000)	160000(97000,243000)	0.41	172000(102000,263000)	170500(96000,277250)	179000(105000,243000)	0.838
Creatinine (mg/dl)	0.9(0.61,1.31)	0.9(0.59,1.27)	0.9(0.65,1.49)	0.362	0.85(0.59,1.3)	0.9(0.59,1.27)	0.85(0.6,1.4)	0.853	0.93(0.64,1.3)	0.95(0.65,1.27)	0.89(0.64,1.4)	0.96	0.89(0.65,1.3)	0.9(0.65,1.25)	0.85(0.6,1.41)	0.983
INR	1.2(1.1,1.4)	1.2(1.1,1.41)	1.2(1.1,1.4)	0.604	1.2(1.1,1.4)	1.25(1.1,1.4)	1.2(1.1,1.4)	0.665	1.2(1.1,1.4)	1.2(1.1,1.4)	1.2(1,1.4)	0.439	1.2(1.1,1.4)	1.2(1.07,1.33)	1.2(1.1,1.4)	0.607
Total bilirrubin (mg/dl)	0.5(0.2,0.9)	0.5(0.2,1)	0.47(0.23,0.8)	0.748	0.47(0.2,0.88)	0.48(0.2,0.9)	0.47(0.2,0.8)	0.921	0.47(0.24,0.9)	0.47(0.23,0.91)	0.47(0.24,0.8)	0.818	0.47(0.24,0.88)	0.5(0.29,0.9)	0.41(0.2,0.7)	0.237
Dose of norepinephrine (mcg/kg/min)	0(0,0)	0(0,0)	0(0,0.05)	0.487	0(0,0.07)	0(0,0.01)	0(0,0.09)	0.414	0(0,0.07)	0(0,0.01)	0(0,0.09)	0.538	0(0,0.06)	0(0,0.04)	0(0,0.07)	0.794
Antibiotics	71(37)	32(38)	39(36)	0.857	71(37)	32(38)	39(36)	0.857	71(37)	32(38)	39(36)	0.857	71(37)	32(38)	39(36)	0.857
Antifungal	16(8)	7(8)	9(8)	1	16(8)	7(8)	9(8)	1	16(8)	7(8)	9(8)	1	16(8)	7(8)	9(8)	1
Antiviral	10(5)	3(4)	7(6)	0.518	10(5)	3(4)	7(6)	0.518	10(5)	3(4)	7(6)	0.518	10(5)	3(4)	7(6)	0.518
Inhaled steroids	5(3)	0(0)	5(5)	0.07	5(3)	0(0)	5(5)	0.07	5(3)	0(0)	5(5)	0.07	5(3)	0(0)	5(5)	0.07
Endovenous steroids	82(42)	37(44)	45(41)	0.812	82(42)	37(44)	45(41)	0.812	82(42)	37(44)	45(41)	0.812	82(42)	37(44)	45(41)	0.812

## Sheet: Hoja2
	ARDS				OLB
	All patients - trainee cohort - (n=193)	Non DAD (n= 84)	DAD (n= 109)	p value	All patients - trainee cohort - (n=193)	Non DAD (n= 84)	DAD (n= 109)	p value
Fio2	0.8(0.6,1)	0.8(0.6,1)	0.8(0.6,1)	0.809	0.6(0.5,0.8)	0.55(0.4,0.8)	0.6(0.5,0.8)	0.095
Pa02 (mmHg)	78(63.4,105.1)	75.1(61.77,90.53)	84(65.1,115)	0.053	74(64,89.8)	74.2(64.75,85.7)	74(63.3,98.7)	0.77
Pa02Fi02 rate	114.29(76.4,161.8)	107.46(76.23,150.21)	122(78,178.29)	0.188	135.5(90.5,178)	142.47(97.56,184.6)	131.82(87.9,170)	0.265
PaCo2 (mmHg)	41.4(35,51)	42.4(35.25,50.05)	40(35,51)	0.803	47(39.1,57)	45.9(38.15,54.73)	49(39.1,58.4)	0.268
Volume tidal (ml)	420(359,500)	420(350,500)	440(360,500)	0.368	420(361,460)	420(360,460)	402(362,450)	0.498
Volumen tidal per kg (ml/kg)	6.19(5.15,8.21)	6.28(5.28,8.25)	6.19(4.94,7.81)	0.564	6.2(4.98,7.77)	6.12(5.04,8.28)	6.2(4.93,7.44)	0.493
Plateau pressure (mmHg)	24(21,28)	23(20,27.25)	25(22,29)	0.05	30(25,33)	28(22,32.25)	30(27,33)	0.007
PEEP (mmHg)	10(8,12)	10(6.75,12)	10(8,12)	0.292	10(5,13)	8(5,10.5)	10(6,14)	0.003
Driving pressure (mmhg)	15(12,19)	14(12,18)	17(13,19)	0.244	19(16,24)	18(15.75,23.25)	20(16,24)	0.469
Static compliance (mmhg/ml)	27.5(22.78,33.53)	27.92(23.08,34.46)	25(21.18,33.33)	0.244	23.14(17,27.75)	23.68(16.8,30.48)	22.92(17,26.76)	0.431
Arterial Ph	7.37(7.29,7.43)	7.38(7.31,7.43)	7.37(7.28,7.42)	0.509	7.38(7.32,7.43)	7.38(7.34,7.45)	7.38(7.31,7.43)	0.275
Number of affected cuadrant in the chest X ray	4(4,4)	4(4,4)	4(4,4)	0.376	4(4,4)	4(4,4)	4(4,4)	0.053
Respiratory rate (rpm)	25(20,30)	26(20.75,33)	24(19,30)	0.027	25(20,30)	25(20,30)	25(19,30)	0.505
Heart rate (bpm)	100(89,120)	99.5(85.75,119.25)	102(92,121)	0.22	97.77±20.05	96.76±20.87	98.55±19.46	0.544
Systolic arterial pressure (mmHg)	117(100,134)	116(98,132.5)	120(101,138)	0.52	118(106,134)	115(106,133.25)	121(109,135)	0.272
Temperature (Cº)	37.2(36.5,38)	37.5(36.6,38.23)	37.1(36.5,37.9)	0.182	37.14±1.02	37.22±1.02	37.08±1.02	0.341
Prone possition	2(1)	0(0)	2(2)	0.506	9(5)	4(5)	5(5)	1
Haemoglobin (gr/dl)	10.5(8.6,12.3)	10.45(8.59,12.33)	10.6(8.8,12.3)	0.902	9.5(8.5,10.5)	9.4(8.17,10.1)	9.6(8.6,10.5)	0.144
Leukocytes (cells/ul)	12000(8900,15400)	12240(9197.5,15300)	11960(8500,15590)	0.942	11610(8600,15800)	12400(8900,16625)	11500(8500,15400)	0.343
Platelets (cells/ul)	173000(111000,285000)	176000(96000,268500)	173000(111000,294000)	0.937	178000(104000,263000)	172000(102000,277250)	178000(105000,243000)	0.56
Creatinine (mg/dl)	0.9(0.7,1.31)	0.94(0.72,1.38)	0.9(0.7,1.27)	0.675	0.94(0.62,1.49)	0.95(0.63,1.3)	0.9(0.62,1.71)	0.782
INR	1.2(0.9,1.4)	1.2(1,1.5)	1.1(0.8,1.3)	0.026	1.2(1.1,1.4)	1.2(1.07,1.3)	1.2(1.1,1.4)	0.466
Total bilirrubin (mg/dl)	0.59(0.3,1.06)	0.59(0.29,0.97)	0.6(0.35,1.1)	0.498	0.47(0.24,0.9)	0.47(0.24,0.9)	0.5(0.24,0.8)	0.931
Dose of dobutamine (mcg/kg/min)	0(0,0)	0(0,0)	0(0,0)	0.795	0(0,0)	0(0,0)	0(0,0)	0.988
Dose of norepinephrine (mcg/kg/min)	0(0,0.09)	0(0,0.01)	0(0,0.1)	0.151	0(0,0.05)	0(0,0)	0(0,0.07)	0.582
Antibiotics	132(68)	55(65)	77(71)	0.542	71(37)	32(38)	39(36)	0.857
Antifungal	24(12)	8(1)	16(15)	0.392	16(8)	7(8)	9(8)	1
Antiviral	23(12)	8(1)	15(14)	0.499	10(5)	3(4)	7(6)	0.518
Inhaled steroids	0(0)	0(0)	0(0)	.-	5(3)	0(0)	5(5)	0.07
Endovenous steroids	23(12)	9(11)	14(13)	0.819	82(42)	37(44)	45(41)	0.812
