# Supplementary material for: Predicting the Impact of Diffuse Alveolar Damage through Open Lung Biopsy in Acute Respiratory Distress Syndrome—The PREDATOR Study
Source: J Clin Med. 2019 Jun 11;8(6):829. doi: 10.3390/jcm8060829 (PMC6616523; doi:10.3390/jcm8060829)
Supplement: Supplementary file 1 [file jcm-08-00829-s001.zip › Article Predator_Table S5_V7 mortality bivariate.xlsx]

## Sheet: scenario1_uni_mort
	Dataset 2				Dataset 3				Dataset 4				Dataset 5
Comorbidities	All patients (n=193)	Surviours (n= 76)	Dead (n=117)	p	All patients (n=193)	Surviours (n= 76)	Dead (n=117)	p	All patients (n=193)	Surviours (n= 76)	Dead (n=117)	p	All patients (n=193)	Surviours (n= 76)	Dead (n=117)	p
Active smoking	37(19)	18(24)	19(16)	0.273	37(19)	18(24)	19(16)	0.273	37(19)	18(24)	19(16)	0.273	37(19)	18(24)	19(16)	0.273
Active solid neoplasms	37(19)	13(17)	24(21)	0.689	37(19)	13(17)	24(21)	0.689	37(19)	13(17)	24(21)	0.689	37(19)	13(17)	24(21)	0.689
Active hematooncology neoplasm	32(17)	8(11)	24(21)	0.104	32(17)	8(11)	24(21)	0.104	32(17)	8(11)	24(21)	0.104	32(17)	8(11)	24(21)	0.104
Chemotherapy within the last 3 month	22(11)	9(12)	13(11)	1	22(11)	9(12)	13(11)	1	22(11)	9(12)	13(11)	1	22(11)	9(12)	13(11)	1
Organ transplant	7(4)	2(3)	5(4)	0.706	7(4)	2(3)	5(4)	0.706	7(4)	2(3)	5(4)	0.706	7(4)	2(3)	5(4)	0.706
AIDS/HIV.	7(4)	4(5)	3(3)	0.437	7(4)	4(5)	3(3)	0.437	7(4)	4(5)	3(3)	0.437	7(4)	4(5)	3(3)	0.437
Arterial hypertension	55(28)	20(26)	35(3)	0.705	55(28)	20(26)	35(3)	0.705	55(28)	20(26)	35(3)	0.705	55(28)	20(26)	35(3)	0.705
Coronary ischemic	22(11)	9(12)	13(11)	1	22(11)	9(12)	13(11)	1	22(11)	9(12)	13(11)	1	22(11)	9(12)	13(11)	1
Chronic cardiac failure (NYHA III or IV)	22(11)	11(14)	11(09)	0.394	22(11)	11(14)	11(09)	0.394	22(11)	11(14)	11(09)	0.394	22(11)	11(14)	11(09)	0.394
Chronic kidney injury	11(6)	3(4)	8(7)	0.532	11(6)	3(4)	8(7)	0.532	11(6)	3(4)	8(7)	0.532	11(6)	3(4)	8(7)	0.532
Mellitus diabetes	35(18)	16(21)	19(16)	0.511	35(18)	16(21)	19(16)	0.511	35(18)	16(21)	19(16)	0.511	35(18)	16(21)	19(16)	0.511
Mellitus diabetes insuline requirement	8(4)	7(9)	1(1)	0.007	8(4)	7(9)	1(1)	0.007	8(4)	7(9)	1(1)	0.007	8(4)	7(9)	1(1)	0.007
Domiciliary oxygen therapy	8(4)	3(4)	5(4)	1	8(4)	3(4)	5(4)	1	8(4)	3(4)	5(4)	1	8(4)	3(4)	5(4)	1
Inhaled b2 agonist	6(3)	4(5)	2(2)	0.214	6(3)	4(5)	2(2)	0.214	6(3)	4(5)	2(2)	0.214	6(3)	4(5)	2(2)	0.214
Inhaled steroids	11(6)	5(7)	6(5)	0.755	11(6)	5(7)	6(5)	0.755	11(6)	5(7)	6(5)	0.755	11(6)	5(7)	6(5)	0.755
Systemic steroids	26(13)	10(13)	16(14)	1	26(13)	10(13)	16(14)	1	26(13)	10(13)	16(14)	1	26(13)	10(13)	16(14)	1
Chronic obstructive pulmonary disease	35(18)	16(21)	19(16)	0.511	35(18)	16(21)	19(16)	0.511	35(18)	16(21)	19(16)	0.511	35(18)	16(21)	19(16)	0.511
Baseline characteristic
Female	66(34)	27(36)	39(33)	0.874	66(34)	27(36)	39(33)	0.874	66(34)	27(36)	39(33)	0.874	66(34)	27(36)	39(33)	0.874
Age (years old)	61(46,70)	56(44.5,66.25)	64(49,72)	0.01	61(46,70)	56(44.5,66.25)	64(49,72)	0.01	61(46,70)	56(44.5,66.25)	64(49,72)	0.01	61(46,70)	56(44.5,66.25)	64(49,72)	0.01
Weight (Kg)	65(56.9,75)	65(55.75,83.12)	65(57,74)	0.909	64(55,75)	62.85(53.75,83.88)	65(56,74)	0.939	65(56,75)	65(55,85)	65(56,74)	0.47	65(56,75)	65(52.75,83.88)	65(56,74)	0.873
Days from ARDS to OLB	7(2,12)	7(2,11.25)	6(3,12)	0.626	7(2,12)	7(2,11.25)	7(3,12)	0.595	7(2,12)	7(2,12.25)	7(3,12)	0.709	7(2,12)	7(2,11.25)	6(3,12)	0.674
Days from hospital admission to ARDS	3(0,8)	2.5(0,9.25)	3(0,7)	0.648	3(0,8)	2.5(0,10)	3(0,7)	0.866	3(0,8)	3(0,8.25)	3(1,8)	0.904	3(0,8)	3.5(0,9.25)	3(0,7)	0.705
Days of hospital stayed	39(21,61)	51.5(32.75,83.25)	34(18,50)	0	41(24,63)	51.5(39.75,84)	34(18,53)	0	40(22,62)	49.5(32.75,80.25)	34(18,53)	0	40(22,64)	51.5(37.5,84.5)	32(18,54)	0
Days of ICU stay	29(16,47)	33(21,57.25)	26(14,38)	0.001	29(16,47)	33(21,57.25)	26(14,38)	0.001	29(16,47)	33(21,57.25)	26(14,38)	0.001	29(16,47)	33(21,57.25)	26(14,38)	0.001
Days on mechanical ventilation	19(11,36)	17(10.75,35)	20(11,36)	0.679	18(11,38)	17(10.75,35)	20(11,38)	0.857	18(11,38)	17(10.75,35)	20(11,38)	0.644	19(11,38)	17(10.75,35)	21(11,38)	0.612
Day of ARDS
Fio2	0.8(0.6,1)	0.8(0.6,0.9)	0.8(0.6,1)	0.236	0.8(0.6,1)	0.8(0.6,0.9)	0.8(0.6,1)	0.209	0.8(0.6,1)	0.78(0.6,0.9)	0.8(0.6,1)	0.148	0.8(0.6,1)	0.8(0.6,0.94)	0.8(0.6,1)	0.22
Pa02 (mmHg)	77(64.3,105.1)	73.6(59.85,87)	84.4(65.2,119.4)	0.006	77(63,105)	74(59.3,87)	84(65,119.4)	0.011	79.6(65,106.3)	74(59.85,86)	88(66,122)	0.001	78.4(63.4,105.1)	76(59.85,92.2)	84.4(65,119.4)	0.019
Pa02Fi02 rate	115.12(78,163.29)	105(75.29,140)	124(85.56,175)	0.058	115.12(78,165)	105.05(75.29,141.45)	124(87.11,178.29)	0.043	115.12(76.4,168)	104.17(74,141.45)	126(83.19,179.67)	0.03	115.62(78,165)	105.05(76.23,141.45)	126(86,178.29)	0.069
PaCo2 (mmHg)	40.7(35,50.1)	40(33,49.25)	41(36,50.2)	0.183	41.4(34.5,50.1)	41(33,49.25)	41.4(36,50.2)	0.271	42(35.5,51)	42.5(34,52.25)	42(36,51)	0.633	41.4(35.5,50.2)	41.5(33,50.5)	41.4(36,50.2)	0.429
Tidal volume (ml)	430(370,500)	427(387.5,500)	430(360,500)	0.959	440(360,500)	427(367.5,491.5)	443(360,503)	0.419	440(360,500)	440.5(387.5,500)	440(355,504)	0.941	420(355,476)	420(360,477)	420(349,470)	0.412
Tidal volume (ml/kg)	6.38(4.95,7.75)	6.37(5.11,7.85)	6.4(4.95,7.53)	0.697	6.45(5.17,7.81)	6.38(4.94,7.66)	6.54(5.17,8.21)	0.433	6.13(4.93,7.63)	5.87(4.77,7.36)	6.54(5.17,7.81)	0.124	6.36(5.15,7.35)	6.49(5.16,7.32)	6.13(5.15,7.4)	0.83
Plateau pressure (cmH2O)	24(22,28)	23(20.75,27)	25(22,29)	0.002	24(20,28)	23(20,27)	24(21,28)	0.308	24(21,28)	24(20.75,27.25)	25(21,29)	0.555	23(20,28)	23(21,27)	24(19,28)	0.392
PEEP (cmH2O)	10(7,12)	10(7.75,12)	10(7,12)	0.415	10(8,12)	10(7.75,12)	10(8,12)	0.179	10(7,12)	10(7.75,12)	10(6,12)	0.115	10(7,12)	10(8,12)	10(6,12)	0.053
Driving pressure (cmH2O)	17(12,19)	14(12,18)	18(13,22)	0.002	15(12,20)	14(12,20.5)	16(12,20)	0.274	14(12,17)	13(11,16)	15(12,18)	0.004	14(12,18)	13(12,18)	15(12,18)	0.204
Static compliance (ml/cmH2O)	28.91(21.88,35)	30(23.18,35.71)	25.36(17.22,34.62)	0.047	30(23.21,35)	30(23.21,35)	30(22.78,35.45)	0.635	28.91(23.08,35.45)	30(23.33,36.15)	27.5(20,34.62)	0.011	27.5(21.88,35)	25.36(22.55,35.45)	28.91(21.18,35)	0.954
Arterial pH	7.37(7.29,7.42)	7.38(7.29,7.42)	7.35(7.29,7.43)	1	7.35(7.3,7.42)	7.36(7.3,7.42)	7.35(7.29,7.42)	0.839	7.35(7.29,7.43)	7.38(7.3,7.42)	7.34(7.29,7.43)	0.788	7.35(7.29,7.42)	7.36(7.31,7.42)	7.34(7.29,7.42)	0.698
Respiratory rate (breaths per minute)	25(20,31)	25(18.75,31)	25(20,32)	0.203	25(20,31)	24.5(18,31)	25(20,32)	0.112	25(20,30)	24(18.75,30)	25(20,30)	0.273	25(20,31)	24.5(18.75,30)	25(21,32)	0.089
Heart rate (beats per minute)	100(90,119)	99(88.5,110.5)	104(92,122)	0.104	102(90,119)	98(87,107.25)	105(92,124)	0.007	105(92,122)	98.5(87.75,112)	111(95,125)	0.004	101(91,119)	99(90.75,110.5)	105(92,123)	0.09
Systolic arterial pressure (mmHg)	114(98,130)	113.5(98.75,130)	114(98,130)	0.96	114(99,130)	113(98.75,130)	115(100,130)	0.642	116(101,130)	117(102,129.25)	114(98,130)	0.576	114(100,130)	116.5(102,130)	112(98,130)	0.667
Temperature (Cº)	37.2(36.5,38)	37.5(36.4,38.05)	37.2(36.6,37.8)	0.528	37.2(36.6,38)	37.5(36.6,38.23)	37.2(36.5,37.7)	0.306	37.2(36.6,37.9)	37.7(36.8,38.4)	37.1(36.5,37.6)	0.005	37.2(36.5,37.8)	37.55(36.77,38.23)	37(36.5,37.6)	0.016
Prone possition	2(1)	2(3)	0(0)	0.154	2(1)	2(3)	0(0)	0.154	2(1)	2(3)	0(0)	0.154	2(1)	2(3)	0(0)	0.154
Haemoglobin (gr/dl)	10.4(8.6,11.7)	10.55(8.55,11.62)	10.1(8.7,11.7)	0.834	10.6(8.7,12.3)	10.7(8.78,12.3)	10.5(8.6,12)	0.644	10.1(8.6,11.7)	10.05(8.5,11.7)	10.1(8.6,11.7)	0.992	10.1(8.6,11.7)	9.8(8.47,11.62)	10.4(8.8,11.7)	0.379
Leukocytes (cells/ul)	11310(8900,15300)	10650(8075,14827.5)	12000(9200,15400)	0.111	11400(8500,15400)	10950(8500,14827.5)	12480(8900,17000)	0.245	11400(8500,15400)	10700(8800,14750)	12000(8500,17500)	0.282	11200(8100,15300)	10700(7900,14827.5)	11500(8500,15400)	0.299
Platelets (cells/ul)	176000(109000,281000)	193000(111000,272750)	166000(93000,281000)	0.36	168000(111000,269000)	2e+05(121000,282000)	161000(93000,248000)	0.073	173000(111000,269000)	184500(117750,282000)	164000(93000,257000)	0.207	178000(116000,282000)	2e+05(121000,285000)	173000(111000,282000)	0.396
Creatinine (mg/dl)	0.9(0.72,1.31)	0.92(0.7,1.23)	0.9(0.72,1.4)	0.631	0.98(0.72,1.35)	0.98(0.69,1.3)	0.98(0.73,1.42)	0.553	0.98(0.72,1.4)	0.99(0.75,1.32)	0.96(0.72,1.6)	0.937	0.9(0.72,1.3)	0.94(0.72,1.23)	0.89(0.72,1.35)	0.84
INR	1.2(1,1.4)	1.2(0.92,1.3)	1.2(1,1.4)	0.438	1.2(1,1.4)	1.2(0.7,1.4)	1.2(1,1.4)	0.613	1.2(0.8,1.4)	1.1(0.38,1.4)	1.2(0.9,1.4)	0.249	1.2(0.8,1.4)	1.1(0,1.4)	1.2(1,1.4)	0.152
Total bilirrubin (mg/dl)	0.53(0.3,1.06)	0.6(0.3,1.12)	0.53(0.3,1.06)	0.781	0.53(0.3,1)	0.52(0.3,1.06)	0.53(0.29,0.88)	0.642	0.53(0.29,0.9)	0.6(0.3,1.06)	0.47(0.24,0.88)	0.202	0.53(0.24,1.06)	0.6(0.23,1.06)	0.53(0.29,0.94)	0.739
Dose of norepinephrine (mcg/kg/min)	0(0,0.09)	0(0,0.12)	0(0,0.08)	0.204	0(0,0.12)	0(0,0.12)	0(0,0.1)	0.681	0(0,0.09)	0(0,0.12)	0(0,0.08)	0.919	0(0,0.09)	0(0,0.09)	0(0,0.1)	0.739
Antibiotics	132(68)	55(72)	77(66)	0.424	132(68)	55(72)	77(66)	0.424	132(68)	55(72)	77(66)	0.424	132(68)	55(72)	77(66)	0.424
Antifungal	24(12)	9(12)	15(13)	1	24(12)	9(12)	15(13)	1	24(12)	9(12)	15(13)	1	24(12)	9(12)	15(13)	1
Antiviral	23(12)	8(11)	15(13)	0.8	23(12)	8(11)	15(13)	0.8	23(12)	8(11)	15(13)	0.8	23(12)	8(11)	15(13)	0.8
Inhaled steroids
Endovenous steroids	23(12)	12(16)	11(9)	0.267	23(12)	12(16)	11(9)	0.267	23(12)	12(16)	11(9)	0.267	23(12)	12(16)	11(9)	0.267
Day of OLB
Fio2	0.6(0.5,0.8)	0.57(0.4,0.7)	0.6(0.5,0.8)	0.02	0.6(0.5,0.8)	0.6(0.4,0.7)	0.6(0.5,0.8)	0.047	0.6(0.5,0.8)	0.6(0.4,0.71)	0.6(0.5,0.8)	0.026	0.6(0.5,0.8)	0.6(0.4,0.7)	0.6(0.5,0.8)	0.024
Pa02 (mmHg)	76(64.7,91.5)	76.5(64.75,88.6)	76(64.7,93)	0.59	76(64,89.8)	76.5(64,85.6)	75(64.4,93)	0.554	76(64.4,89.8)	76.5(64,88.6)	76(64.7,92.3)	0.673	75(64,88.9)	76.5(64,85.7)	75(64.4,90.9)	0.823
Pa02Fi02 rate	140(93.71,178)	147.17(98.14,178.5)	135(87.11,172)	0.226	137.29(90.5,178)	142.47(98.14,178.5)	135(85.5,175)	0.249	135(89.04,176.92)	142.47(97.56,178.5)	132(86.67,175)	0.205	135.5(87.9,178)	147.17(98.14,182.64)	132(85.5,172)	0.109
PaCo2 (mmHg)	48(39.1,57)	43.2(34.98,51)	52(43,61)	0	47(39,57)	43.6(34.98,51)	51.2(41,61)	0	46(38.2,57)	43.6(34.98,51.05)	50(40.7,59.4)	0	46.2(39,57)	43.2(34.98,50.1)	51(41.4,59.6)	0
Volume tidal (ml)	408(360,450)	420(370,460)	400(350,444)	0.149	400(350,450)	420(360,460)	400(350,448)	0.285	408(360,460)	420(371.5,462.5)	400(350,450)	0.17	408(350,450)	420(367.5,472.25)	400(348,444)	0.062
Volumen tidal per kg (ml/kg)	6(4.89,7.44)	5.98(4.87,7.5)	6.2(5.05,7.44)	0.549	6.4(5.05,8.15)	6.34(4.97,8.46)	6.4(5.14,7.73)	0.911	6.34(4.93,7.72)	6.25(4.87,7.8)	6.39(5.08,7.49)	0.903	6.04(4.89,7.72)	6.35(4.88,7.8)	6(4.89,7.42)	0.443
Plateau pressure (mmHg)	28(25,33)	27(23,33)	29(25,33)	0.094	29(25,34)	28(23,31.25)	31(27,36)	0	30(25,34)	27(22.75,31.25)	31(27,36)	0	29(25,34)	27(22.75,31)	31(27,36)	0.001
PEEP (cmH2O)	10(5,13)	10(5,13.25)	10(5,12)	0.804	10(5,13)	10(5,13.25)	10(5,12)	0.712	10(5,14)	10(6,14)	10(5,13)	0.408	10(5,13)	10(5,13.25)	10(5,12)	0.666
Driving pressure (cmH2O)	19(15,22)	17(13,20.25)	20(17,24)	0.001	19(15,23)	17(13.75,21)	20(17,25)	0.001	20(16,25)	17(13.75,21.25)	21(17,25)	0	19(15,23)	17.5(14,22.25)	20(17,23)	0.043
Static compliance (ml/cmH2O)	22.76(16.67,31.93)	25.59(16.53,35)	21.43(16.84,27.65)	0.044	22.76(15.29,28.75)	25.46(16.96,34.55)	21.05(14.36,26.76)	0.001	22.31(14.36,28.75)	25.46(16.8,35)	20.36(14.23,26.76)	0.001	21.88(15.04,30)	25.46(16.89,35.29)	20.5(14.9,26.25)	0.002
Arterial pH	7.38(7.32,7.43)	7.4(7.34,7.45)	7.36(7.28,7.41)	0.001	7.38(7.32,7.43)	7.4(7.35,7.46)	7.36(7.3,7.42)	0.001	7.39(7.32,7.43)	7.4(7.35,7.45)	7.37(7.3,7.43)	0.005	7.38(7.32,7.43)	7.4(7.35,7.46)	7.36(7.29,7.42)	0
Respiratory rate (breaths per minute)	25(20,30)	24(20,30)	25(20,30)	0.169	25(20,30)	24(20,30)	26(20,30)	0.301	25(20,30)	23(20,30)	25(20,30)	0.329	25(20,30)	23.5(20,30)	25(20,30)	0.295
Heart rate (beats per minute)	99.04±20.69	96.71±18.91	100.55±21.72	0.196	96(83,110)	96(84,101.5)	98(83,112)	0.292	96(83,112)	95.5(84,108.5)	98(83,113)	0.704	97.34±20.25	96.07±18.67	98.16±21.26	0.472
Systolic arterial pressure (mmHg)	115(106,133)	114.5(105,133)	116(108,132)	0.993	115(105,135)	113(103,137.75)	116(106,135)	0.769	118(109,134)	114.5(106,133)	121(109,135)	0.601	118(106,135)	115(106,134.25)	119(106,135)	0.87
Temperature (Cº)	37.18±1.02	37.35±1.17	37.06±0.9	0.07	37.22±1.05	37.37±1.15	37.13±0.97	0.128	37.22±1.05	37.47±1.2	37.07±0.92	0.014	37.13±1.06	37.28±1.22	37.04±0.92	0.134
Prone possition	9(5)	5(7)	4(3)	0.32	9(5)	5(7)	4(3)	0.32	9(5)	5(7)	4(3)	0.32	9(5)	5(7)	4(3)	0.32
Haemoglobin (gr/dl)	9.2(8.3,10.3)	9.5(8.4,10.43)	9(8.2,10.1)	0.136	9.2(8.3,10.4)	9.5(8.3,10.5)	8.9(8.3,10.1)	0.234	9.2(8.3,10.3)	9.5(8.47,10.43)	9.1(8.2,10)	0.087	9.3(8.3,10.3)	9.6(8.67,10.43)	9(8.1,10)	0.012
Leukocytes (cells/ul)	12000(8900,17500)	10970(8400,14650)	13440(9000,18500)	0.058	12400(8600,15800)	11870(8795,15100)	12700(8500,17500)	0.402	12000(8900,17500)	11300(8575,14650)	12400(9000,18700)	0.113	12300(9000,16000)	11450(8575,14875)	12600(9800,17500)	0.101
Platelets. (cells/ul)	170000(102000,263000)	202000(144000,302000)	155000(80000,219000)	0	172000(102000,264000)	216500(146250,317250)	157000(80000,219000)	0	171000(97000,265000)	216500(146250,317250)	155000(80000,219000)	0	172000(102000,263000)	213000(152500,333250)	155000(79000,215000)	0
Creatinine (mg/dl)	0.9(0.61,1.31)	0.85(0.61,1.2)	0.96(0.62,1.53)	0.196	0.85(0.59,1.3)	0.8(0.59,1.19)	0.9(0.59,1.59)	0.169	0.93(0.64,1.3)	0.9(0.63,1.27)	0.94(0.65,1.53)	0.452	0.89(0.65,1.3)	0.85(0.64,1.22)	0.89(0.65,1.4)	0.482
INR	1.2(1.1,1.4)	1.2(1,1.4)	1.2(1.1,1.4)	0.16	1.2(1.1,1.4)	1.2(1.1,1.4)	1.3(1.1,1.4)	0.516	1.2(1.1,1.4)	1.2(1,1.4)	1.2(1.1,1.4)	0.342	1.2(1.1,1.4)	1.2(1,1.4)	1.2(1.1,1.3)	0.879
Total bilirrubin (mg/dl)	0.5(0.2,0.9)	0.6(0.29,1.35)	0.4(0.2,0.77)	0.016	0.47(0.2,0.88)	0.52(0.24,1)	0.41(0.2,0.8)	0.12	0.47(0.24,0.9)	0.53(0.24,1.15)	0.4(0.2,0.8)	0.045	0.47(0.24,0.88)	0.5(0.23,0.96)	0.41(0.24,0.8)	0.301
Dose of norepinephrine (mcg/kg/min)	0(0,0)	0(0,0)	0(0,0)	0.804	0(0,0.07)	0(0,0.02)	0(0,0.1)	0.385	0(0,0.07)	0(0,0.06)	0(0,0.09)	0.857	0(0,0.06)	0(0,0.04)	0(0,0.09)	0.616
Antibiotics	71(37)	30(39)	41(35)	0.638	71(37)	30(39)	41(35)	0.638	71(37)	30(39)	41(35)	0.638	71(37)	30(39)	41(35)	0.638
Antifungal	16(8)	6(8)	10(9)	1	16(8)	6(8)	10(9)	1	16(8)	6(8)	10(9)	1	16(8)	6(8)	10(9)	1
Antiviral	10(5)	1(1)	9(8)	0.092	10(5)	1(1)	9(8)	0.092	10(5)	1(1)	9(8)	0.092	10(5)	1(1)	9(8)	0.092
Inhaled steroids	5(3)	3(4)	2(2)	0.384	5(3)	3(4)	2(2)	0.384	5(3)	3(4)	2(2)	0.384	5(3)	3(4)	2(2)	0.384
Endovenous steroids	82(42)	35(46)	47(4)	0.51	82(42)	35(46)	47(4)	0.51	82(42)	35(46)	47(4)	0.51	82(42)	35(46)	47(4)	0.51
