# Supplementary figures and images for: Predicting the Impact of Diffuse Alveolar Damage through Open Lung Biopsy in Acute Respiratory Distress Syndrome—The PREDATOR Study
Source: MDPI journal article supplement (doi:10.3390/jcm8060829), 2019-06-11

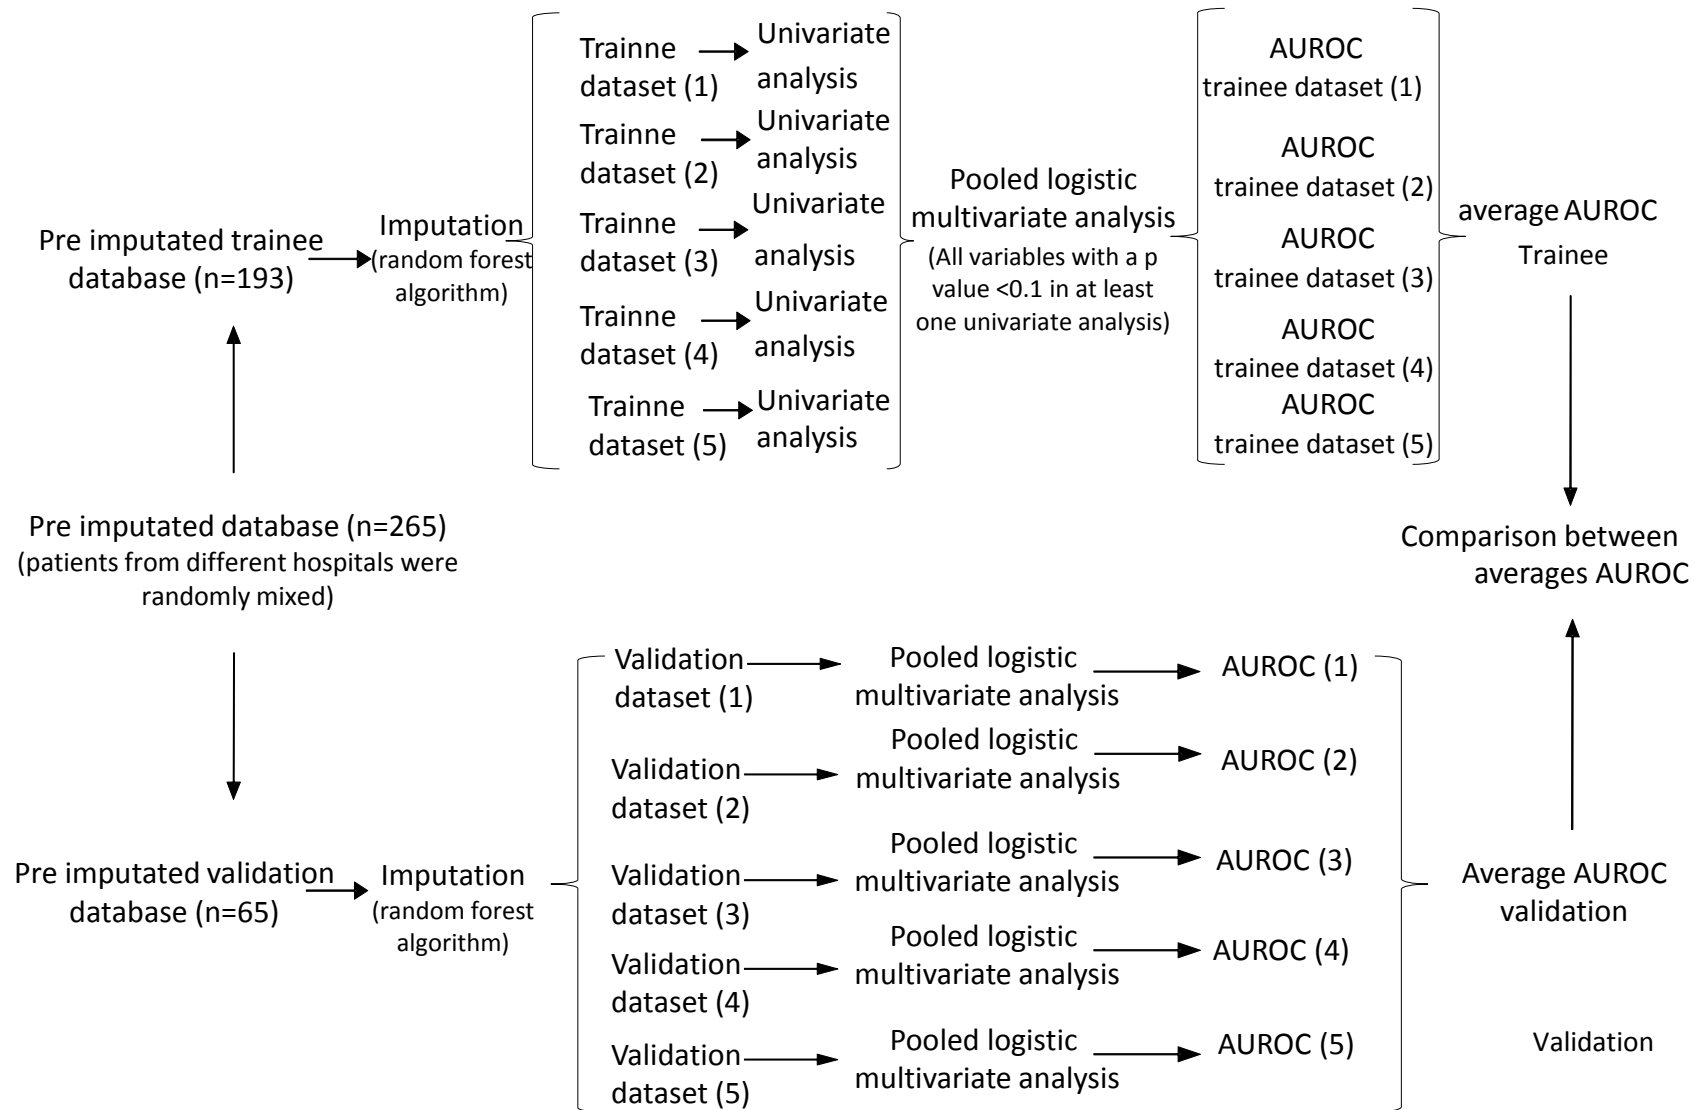

Figure S1

Supplement: s1 [file s1]
